# Supplementary material for: In vitro-derived medium spiny neurons recapitulate human striatal development and complexity at single-cell resolution
Source: PubMed Central journal article supplement — Cell Rep Methods. 2022 Dec 19;2(12):100367. doi: 10.1016/j.crmeth.2022.100367 (PMC9795363; doi:10.1016/j.crmeth.2022.100367), 2022-12-19
Supplement: mmc1.pdf [file mmc1.pdf]

**Cell Reports Methods, Volume 2**

**Supplemental information**

***In vitro*-derived medium spiny neurons  
recapitulate human striatal development  
and complexity at single-cell resolution**

**Paola Conforti, Vittoria Dickinson Bocchi, Ilaria Campus, Linda Scaramuzza, Maura Galimberti, Tiziana Lischetti, Francesca Talpo, Matteo Pedrazzoli, Alessio Murgia, Ivan Ferrari, Chiara Cordiglieri, Alessandra Fasciani, Ernest Arenas, Dan Felsenfeld, Gerardo Biella, Dario Besusso, and Elena Cattaneo**

**Figure S1**

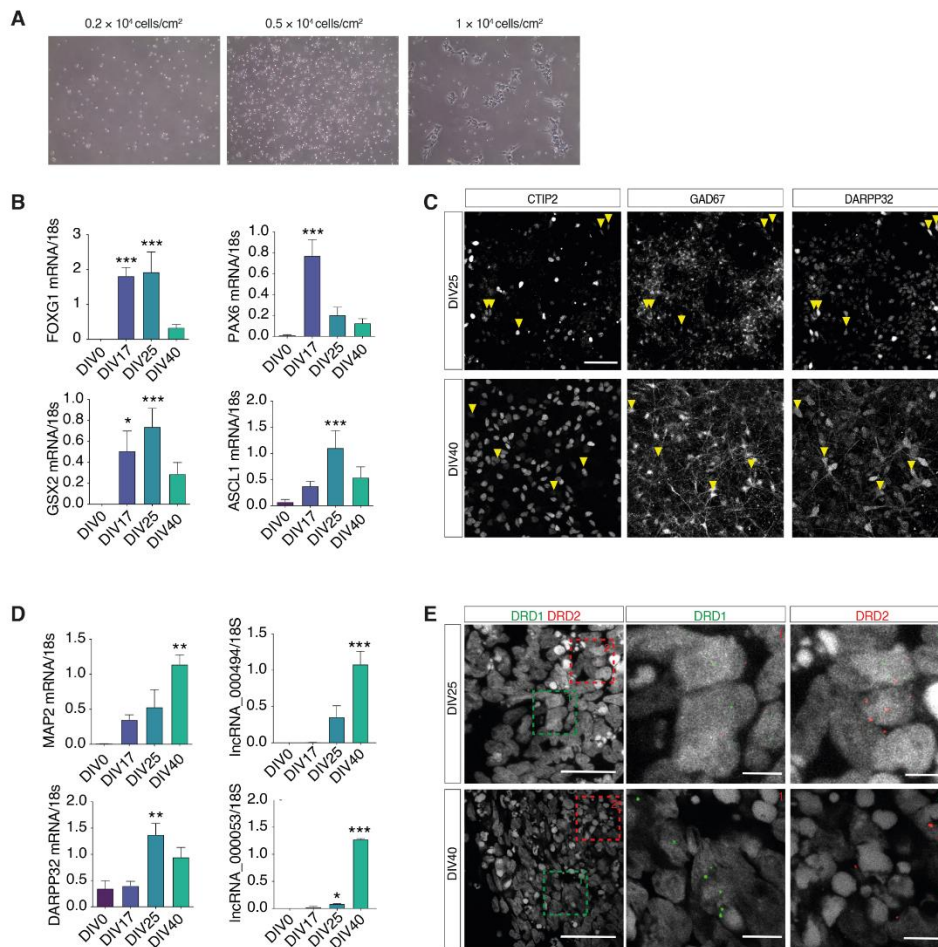

**Figure S1 related to Figure 1. Characterization of the protocol to generate MSNs from H9 hES cells.**

(A) DIV1 phase contrast images of H9 hES cells plated at different densities. (B) qRT-PCR analysis of FOXG1, PAX6, GSX2 and ASCL1 (n=3 independent biological replicates; error bars represent  $\pm$  SEM). (C) Single-channel immunofluorescent staining for CTIP2/DARPP32/GAD67; yellow arrows show triple positive cells; Scale bar, 50  $\mu$ m (D) qRT-PCR analysis of MAP2, DARPP32, lncRNA\_000494 and of lncRNA\_000053; (n=3 independent biological replicates; error bars represent  $\pm$  SEM). Anova one way, Tukey's multiple comparison test, \*p < 0.05; \*\*p < 0.01, \*\*\*p < 0.001 (E) FISH of DRD1 and DRD2. Scale bars, 50  $\mu$ m.



Figure S3

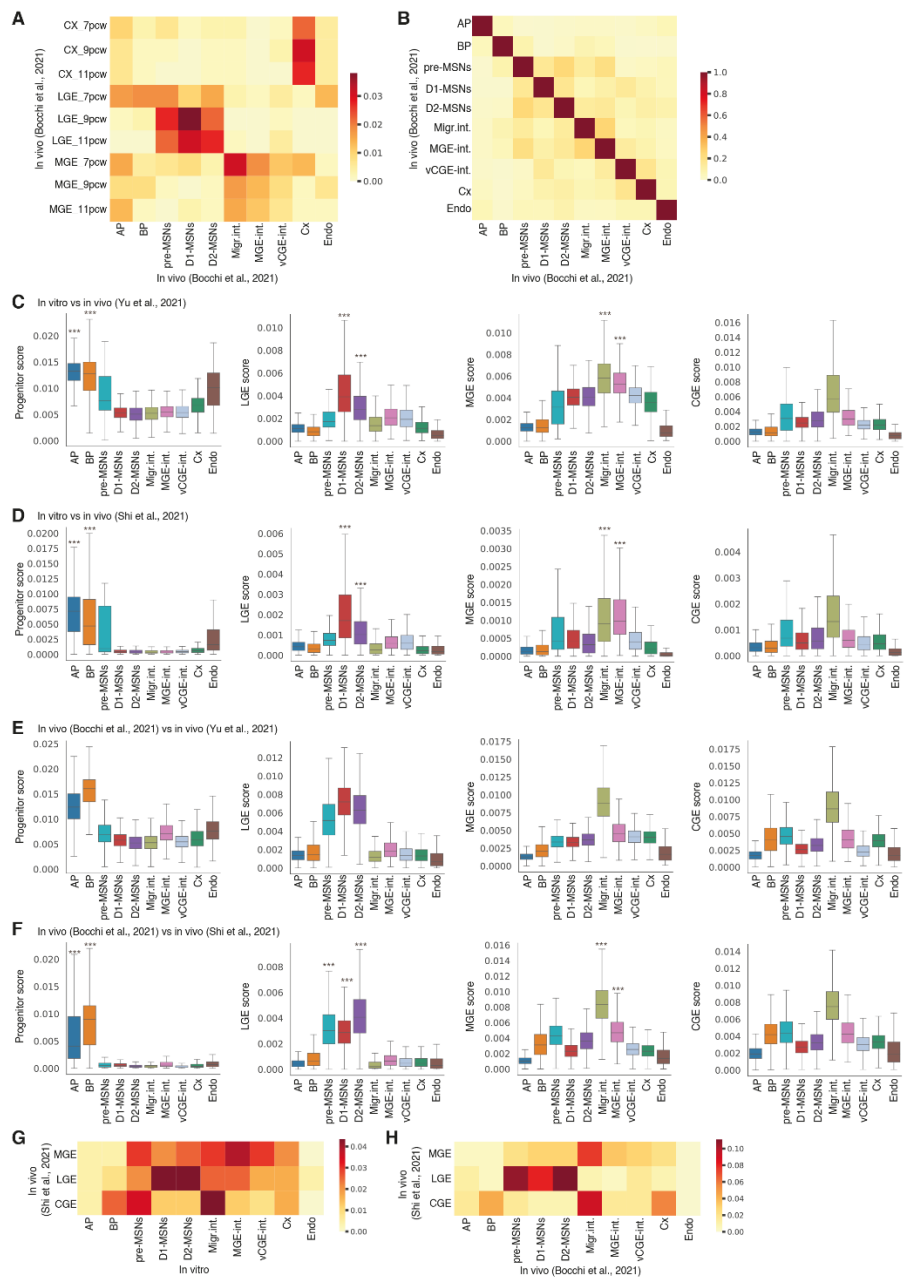

Figure S3 related to Figure 2. Similarity scoring between *in vitro* generated cells and the human fetal brain.

(A, B) Heatmap of the Jaccard index for the comparison between bulk RNA-seq *in vivo* signatures<sup>12</sup> and *in vivo* cell types<sup>12</sup> (A) and between *in vivo* cell-type specific signatures<sup>12</sup> and *in vivo* cell types<sup>12</sup> (B). (C - F) Box plots showing the enrichment scores for each *in vitro* cell type according to a specific *in vivo* signature and the enrichments scores between *in vivo* and *in vitro* signatures. Mann-Whitney rank test and Benjamini-Hochberg correction; \*\*\* $p < 0.001$ . (G, H) Heatmaps of the Jaccard index for the comparison between *in vivo* LGE, MGE and CGE branching point signatures with *in vitro* cell types (G) and *in vivo* cell types (H).

**Figure S4**

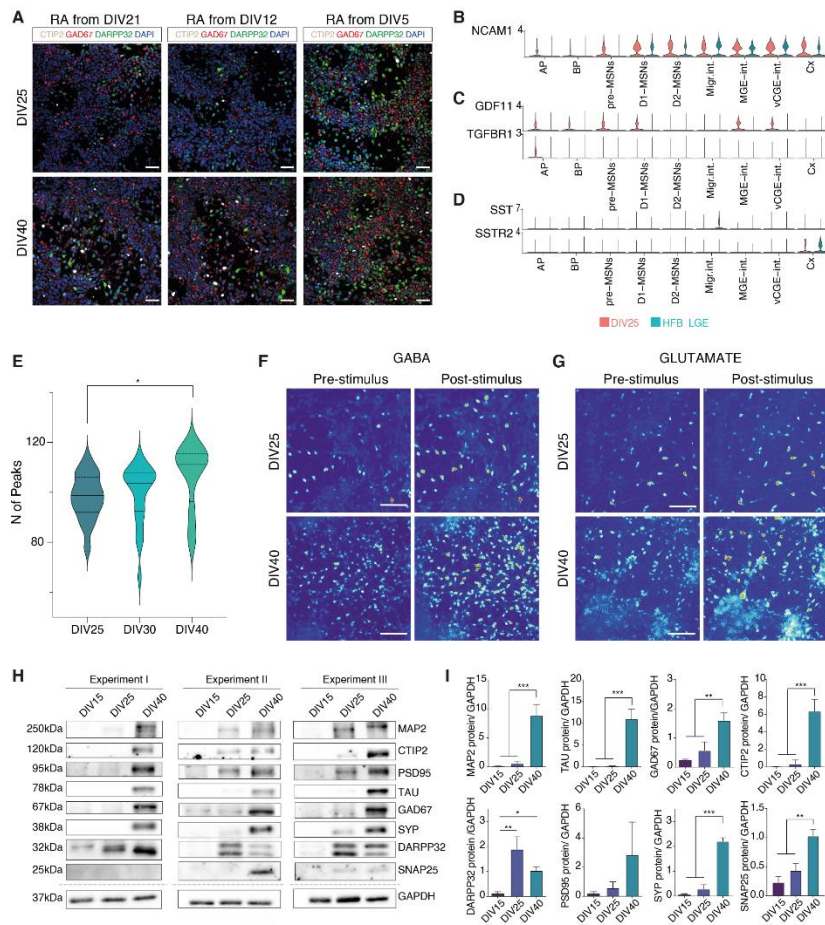

**Figure S4 related to Figure 4. Characterization of the active signaling pathways and functional activity of *in vitro* derived MSNs.**

(A) Immunofluorescent staining for CTIP2/DARPP32/GAD67 with RA given from DIV21 of differentiation (standard protocol), from DIV12 or from DIV5. Scale bars, 50  $\mu$ m. (B-D) Violin plot showing expression of ligand-receptor pairs *in vitro* and *in vivo*<sup>12</sup>. (E) Ca<sup>++</sup> imaging basal activity.  $n \geq 12$  from 2/3 independent biological replicates. Krustal-Wallis test with Dunn's post test. \* $p < 0,05$ . (F, G) Picture frames of Ca<sup>++</sup> imaging activity before and after stimulation with GABA (H) or Glutamate (I). (H, I) Western blotting of MAP2, CTIP2, PSD95, TAU, GAD67, SYP, DARPP32, SNAP25 and GAPDH ( $n=3$  independent biological replicates; error bars represent  $\pm$  SEM); densitometric analysis Anova one way, Tukey's multiple comparison test, \* $p < 0.05$ , \*\* $p < 0.01$ , \*\*\* $p < 0.001$ . The black boxes are aligned outside the blot area for presentation purposes.
